# Supplementary material for: PPIGCF: A Protein–Protein Interaction-Based Gene Correlation Filter for Optimal Gene Selection
Source: MDPI journal article supplement (doi:10.3390/genes14051063), 2023-05-10
Supplement: s1 [file s1]

# PPIGCF: A Protein–Protein Interaction-Based Gene Correlation Filter for Optimal Gene Selection

Soumen Kumar Pati <sup>1,†</sup>, Manan Kumar Gupta <sup>1,†</sup>, Ayan Banerjee <sup>2,†</sup>, Saurav Mallik <sup>3,4,5</sup>  
and Zhongming Zhao <sup>3,6,\*</sup>

<sup>1</sup> Department of Bioinformatics, Maulana Abul Kalam Azad University of Technology, Haringhata 741249, West Bengal, India

<sup>2</sup> Department of Computer Science and Engineering, Jalpaiguri Govt. Engineering College, Jalpaiguri 735102, West Bengal, India

<sup>3</sup> Center for Precision Health, School of Biomedical Informatics, The University of Texas Health Science Center at Houston, Houston, TX 77030, USA; smallik@arizona.edu

<sup>4</sup> Department of Environmental Health, Harvard T H Chan School of Public Health, Boston, MA 02115, USA

<sup>5</sup> Department of Pharmacology & Toxicology, University of Arizona, Tucson, AZ 85721, USA

<sup>6</sup> Human Genetics Center, School of Public Health, The University of Texas Health Science Center at Houston, Houston, TX 77030, USA

\* Correspondence: zhongming.zhao@uth.tmc.edu

† These authors contributed equally to this work.

## Supplementary Materials

**Table S1:** Gene classification based on GO similarity

| GO ID      | CC                                    | Leukemia | Colon | DLBCL | Lung | Prostate |
|------------|---------------------------------------|----------|-------|-------|------|----------|
| GO:0003674 | Molecular function                    | 712      | 223   | 797   | 1392 | 1400     |
| GO:0005764 | Lysosome                              | 729      | 222   | 791   | 1091 | 1400     |
| GO:0005783 | endoplasmic reticulum                 | 793      | 225   | 393   | 1398 | 1400     |
| GO:0005794 | Golgi apparatus                       | 792      | 220   | 765   | 1456 | 1400     |
| GO:0005886 | plasma membrane                       | 761      | 211   | 987   | 1154 | 1400     |
| GO:0008150 | Biological process                    | 994      | 229   | 1567  | 1393 | 1400     |
| GO:0016021 | An integral component of the membrane | 345      | 222   | 723   | 1241 | 1400     |
| GO:0005737 | Cytoplasm                             | 1093     | 223   | 696   | 1397 | 1400     |
| GO:0015630 | Microtubule cytoskeleton              | 793      | 221   | 799   | 1345 | 1400     |

**Table S2:** Gene reduction based on PPI network

| GO ID      | Leukemia |     | Colon  |     | DLBCL   |     | Lung   |     | Prostate |     |
|------------|----------|-----|--------|-----|---------|-----|--------|-----|----------|-----|
|            | # genes  | IIG | #genes | IIG | # genes | IIG | #genes | IIG | # genes  | IIG |
| GO:0003674 | 712      | 39  | 223    | 23  | 797     | 139 | 1392   | 34  | 1400     | 186 |
| GO:0005764 | 729      | 135 | 222    | 22  | 791     | 118 | 1091   | 86  | 1400     | 137 |
| GO:0005783 | 793      | 61  | 225    | 25  | 393     | 91  | 1398   | 186 | 1400     | 194 |
| GO:0005794 | 792      | 43  | 220    | 20  | 765     | 54  | 1456   | 137 | 1400     | 139 |
| GO:0005886 | 761      | 77  | 211    | 21  | 987     | 131 | 1154   | 194 | 1400     | 118 |
| GO:0008150 | 994      | 131 | 229    | 29  | 1567    | 103 | 1393   | 84  | 1400     | 131 |
| GO:0016021 | 345      | 23  | 222    | 22  | 723     | 89  | 1241   | 61  | 1400     | 103 |
| GO:0005737 | 1093     | 59  | 223    | 23  | 696     | 24  | 1397   | 7   | 1400     | 166 |
| GO:0015630 | 793      | 97  | 221    | 21  | 799     | 166 | 1345   | 30  | 1400     | 131 |

**Table S3:** Elimination of genes through PCC and NSCC

| GO ID      | Leukemia |     |      | Colon |     |      | DLBCL |     |      |
|------------|----------|-----|------|-------|-----|------|-------|-----|------|
|            | #gene    | PCC | NSCC | #gene | PCC | NSCC | #gene | PCC | NSCC |
| GO:0003674 | 473      | 25  | 4    | 182   | 23  | 3    | 558   | 68  | 86   |
| GO:0005764 | 434      | 20  | 55   | 171   | 22  | 2    | 573   | 95  | 38   |
| GO:0005783 | 632      | 41  | 66   | 157   | 25  | 5    | 202   | 75  | 53   |
| GO:0005794 | 643      | 19  | 37   | 200   | 20  | 2    | 511   | 78  | 85   |

| GO:0005886 | 584   | 73  | 73   | 190      | 21  | 10   | 856 | 97 | 47 |
|------------|-------|-----|------|----------|-----|------|-----|----|----|
| GO:0008150 | 763   | 72  | 79   | 154      | 29  | 9    | 364 | 28 | 50 |
| GO:0016021 | 222   | 89  | 81   | 162      | 22  | 12   | 534 | 93 | 17 |
| GO:0005737 | 144   | 84  | 5    | 197      | 23  | 3    | 572 | 10 | 21 |
| GO:0015630 | 496   | 68  | 87   | 102      | 21  | 12   | 533 | 14 | 19 |
| GO ID      | Lung  |     |      | Prostate |     |      |     |    |    |
|            | #gene | PCC | NSCC | #gene    | PCC | NSCC |     |    |    |
| GO:0003674 | 358   | 96  | 74   | 357      | 186 | 34   |     |    |    |
| GO:0005764 | 1105  | 98  | 12   | 1003     | 137 | 86   |     |    |    |
| GO:0005783 | 212   | 39  | 40   | 1211     | 194 | 186  |     |    |    |
| GO:0005794 | 1139  | 57  | 55   | 318      | 139 | 137  |     |    |    |
| GO:0005886 | 960   | 97  | 6    | 962      | 118 | 194  |     |    |    |
| GO:0008150 | 309   | 64  | 31   | 319      | 131 | 84   |     |    |    |
| GO:0016021 | 1180  | 83  | 96   | 1170     | 103 | 61   |     |    |    |
| GO:0005737 | 1139  | 70  | 51   | 380      | 166 | 7    |     |    |    |
| GO:0015630 | 315   | 30  | 46   | 325      | 131 | 30   |     |    |    |

**Table S4:** Elimination of genes with respect to IC value

| GO ID      | Leukemia |            |              | Colon  |            |              | DLBCL  |            |              |
|------------|----------|------------|--------------|--------|------------|--------------|--------|------------|--------------|
|            | #genes   | < $\delta$ | #final genes | #genes | < $\delta$ | #final genes | #genes | < $\delta$ | #final genes |
| GO:0003674 | 644      | 97         | 547          | 174    | 33         | 141          | 504    | 130        | 374          |
| GO:0005764 | 459      | 9          | 450          | 176    | 32         | 144          | 540    | 63         | 477          |
| GO:0005783 | 627      | 138        | 489          | 170    | 35         | 135          | 164    | 4          | 160          |
| GO:0005794 | 687      | 159        | 528          | 178    | 30         | 148          | 548    | 139        | 409          |
| GO:0005886 | 538      | 121        | 417          | 159    | 31         | 128          | 712    | 145        | 567          |
| GO:0008150 | 712      | 45         | 667          | 162    | 39         | 123          | 386    | 96         | 190          |

|            |     |     |     |     |    |     |     |     |     |
|------------|-----|-----|-----|-----|----|-----|-----|-----|-----|
| GO:0016021 | 152 | 7   | 145 | 166 | 32 | 134 | 534 | 71  | 463 |
| GO:0005737 | 955 | 126 | 829 | 174 | 33 | 141 | 641 | 58  | 583 |
| GO:0015630 | 541 | 85  | 456 | 167 | 31 | 136 | 600 | 182 | 418 |

| GO ID      | Lung   |            |              | Prostate |            |              |
|------------|--------|------------|--------------|----------|------------|--------------|
|            | #genes | < $\delta$ | #final genes | #gene    | < $\delta$ | #final genes |
| GO:0003674 | 188    | 114        | 74           | 358      | 139        | 219          |
| GO:0005764 | 895    | 194        | 601          | 1005     | 118        | 887          |
| GO:0005783 | 133    | 56         | 77           | 212      | 91         | 121          |
| GO:0005794 | 207    | 145        | 62           | 319      | 54         | 265          |
| GO:0005886 | 857    | 94         | 763          | 960      | 131        | 829          |
| GO:0008150 | 214    | 69         | 145          | 309      | 103        | 206          |
| GO:0016021 | 1001   | 101        | 900          | 180      | 79         | 101          |
| GO:0005737 | 269    | 100        | 169          | 390      | 24         | 366          |
| GO:0015630 | 239    | 62         | 177          | 315      | 166        | 149          |

proteins: 100  
interactions: 2  
expected interactions: 2 (p-value: 0.637548993431305)

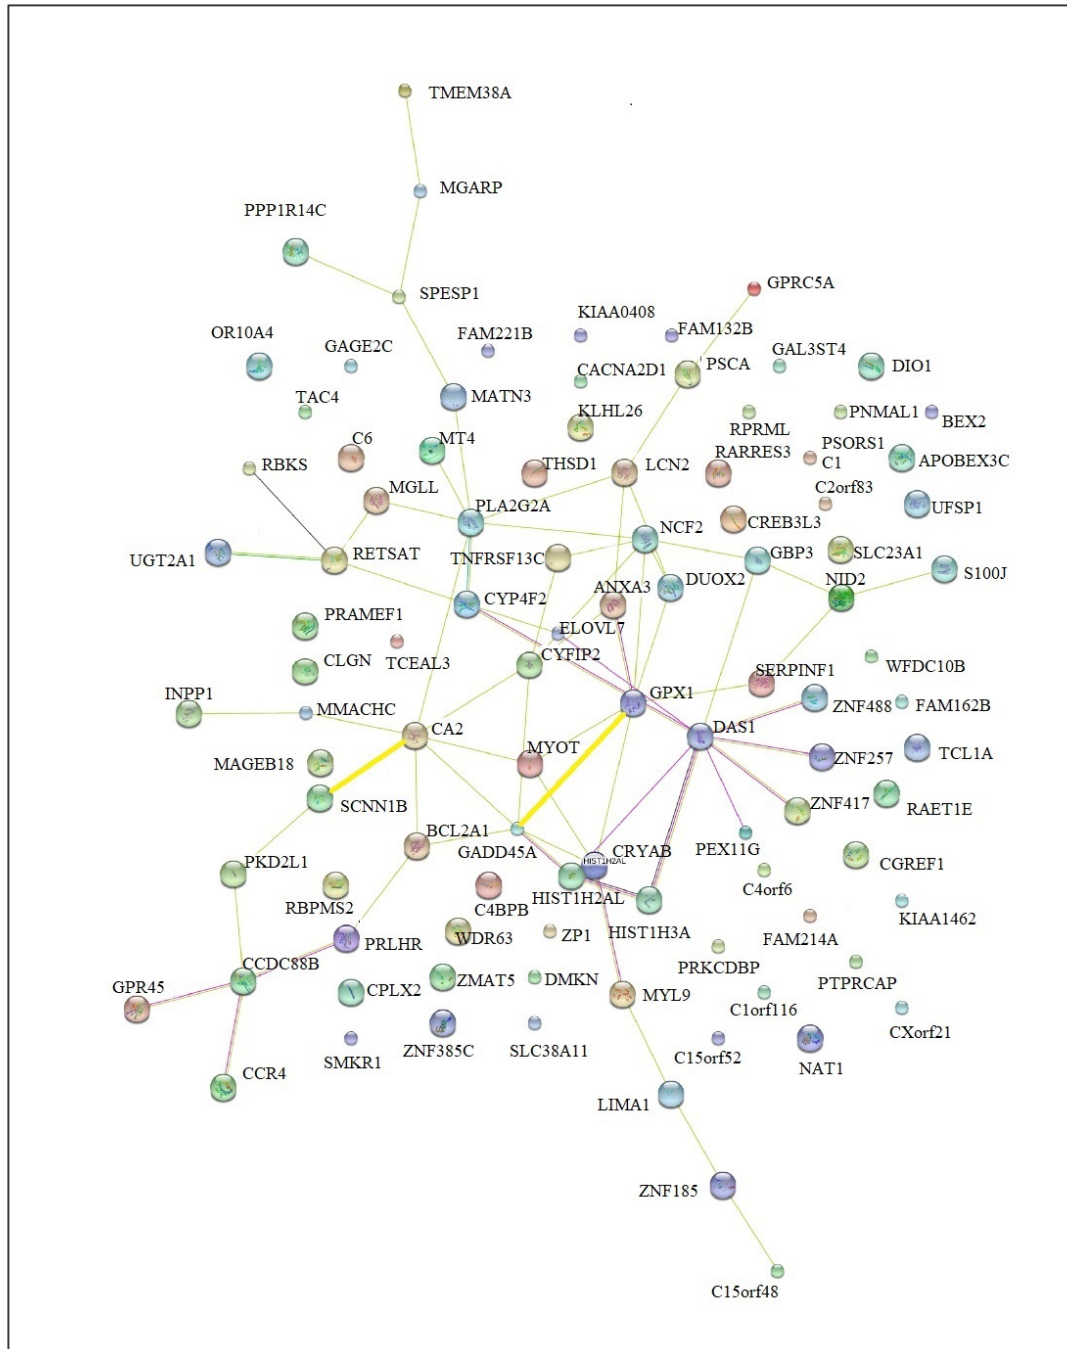

<http://version10.string-db.org/10/p/2126463091>

(a)

proteins: 100  
interactions: 2  
expected interactions: 1 (p-value: 0.573393582116955)

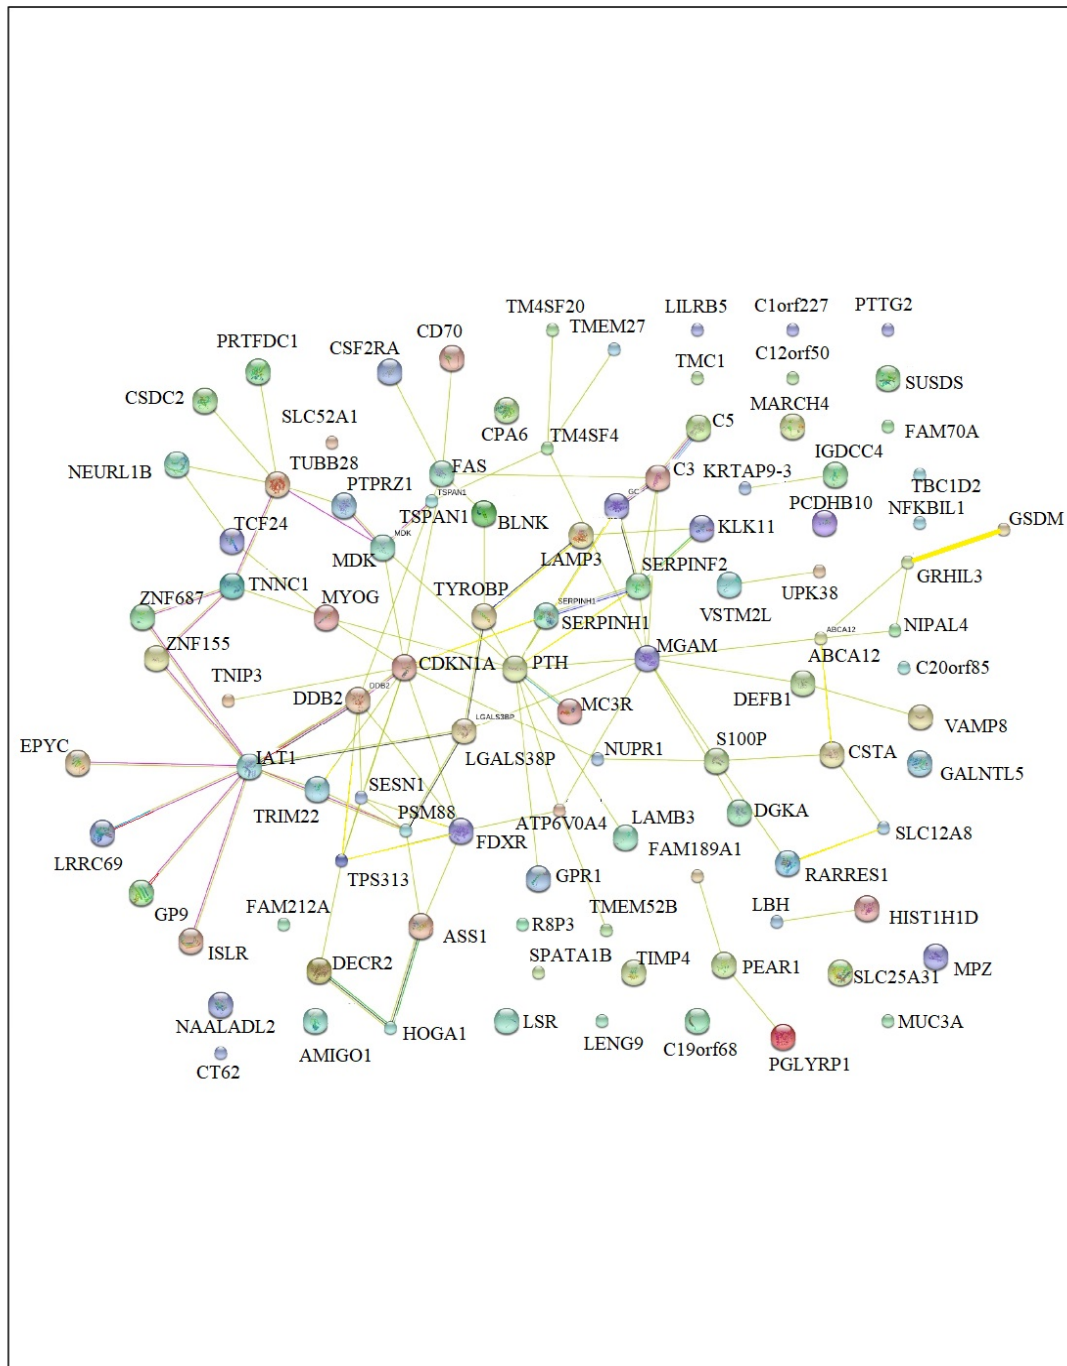

<http://version10.string-db.org/10/p/1257463092>

(b)

proteins: 100  
interactions: 12  
expected interactions: 7 (p-value: 0.0942060734484242)

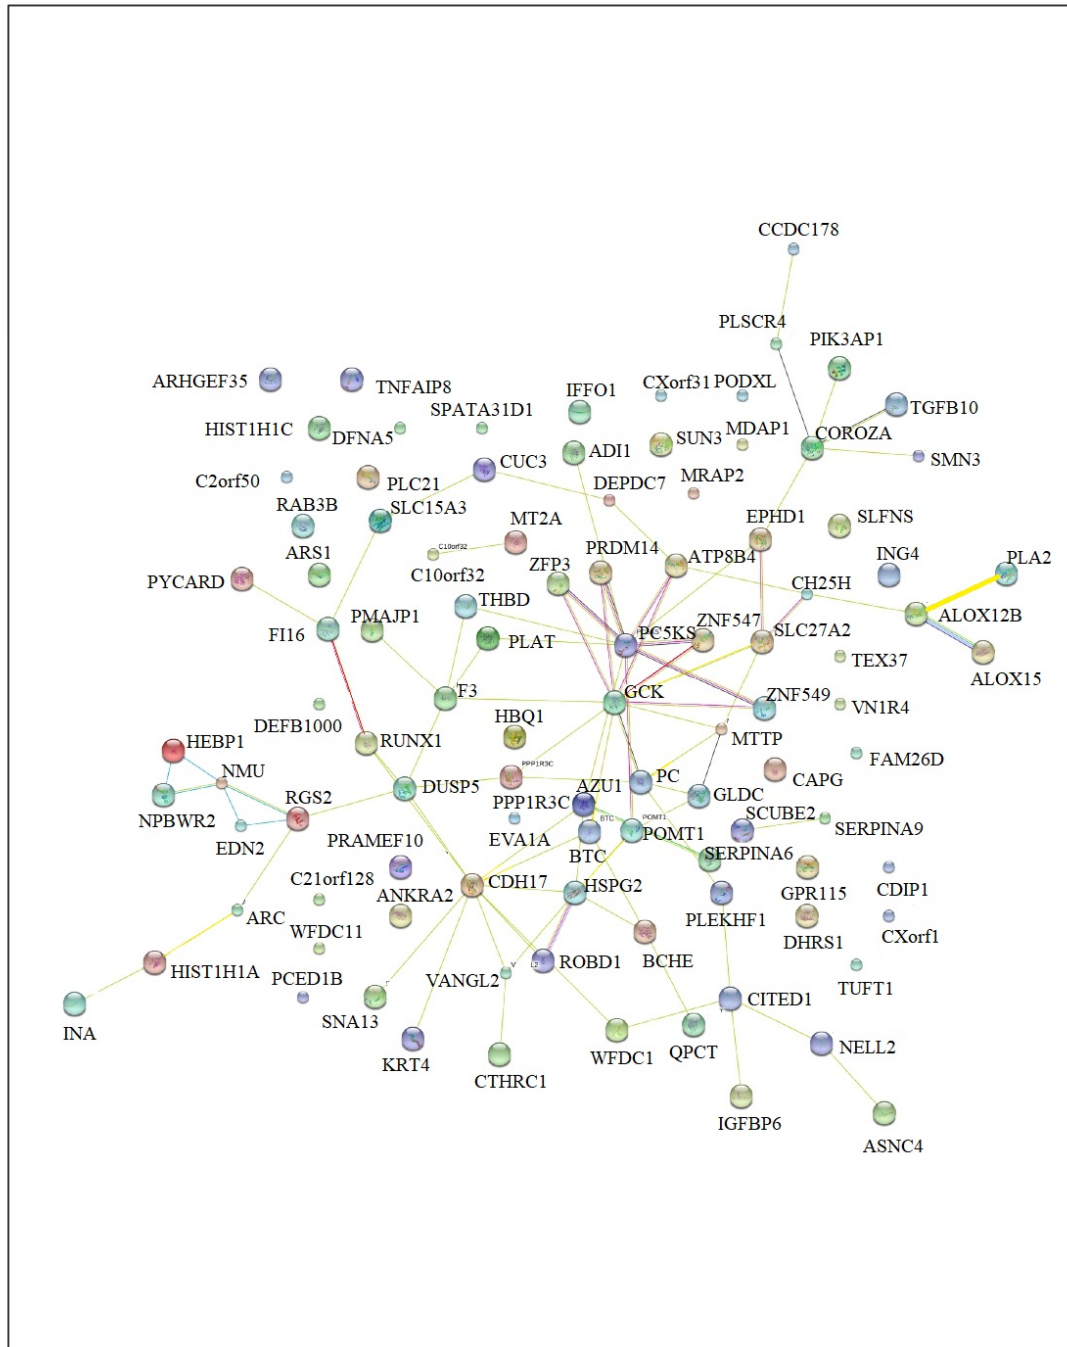

<http://version10.string-db.org/10/p/7463463097>

(c)

proteins: 100  
interactions: 1  
expected interactions: 1 (p-value: 0.807600234904562)

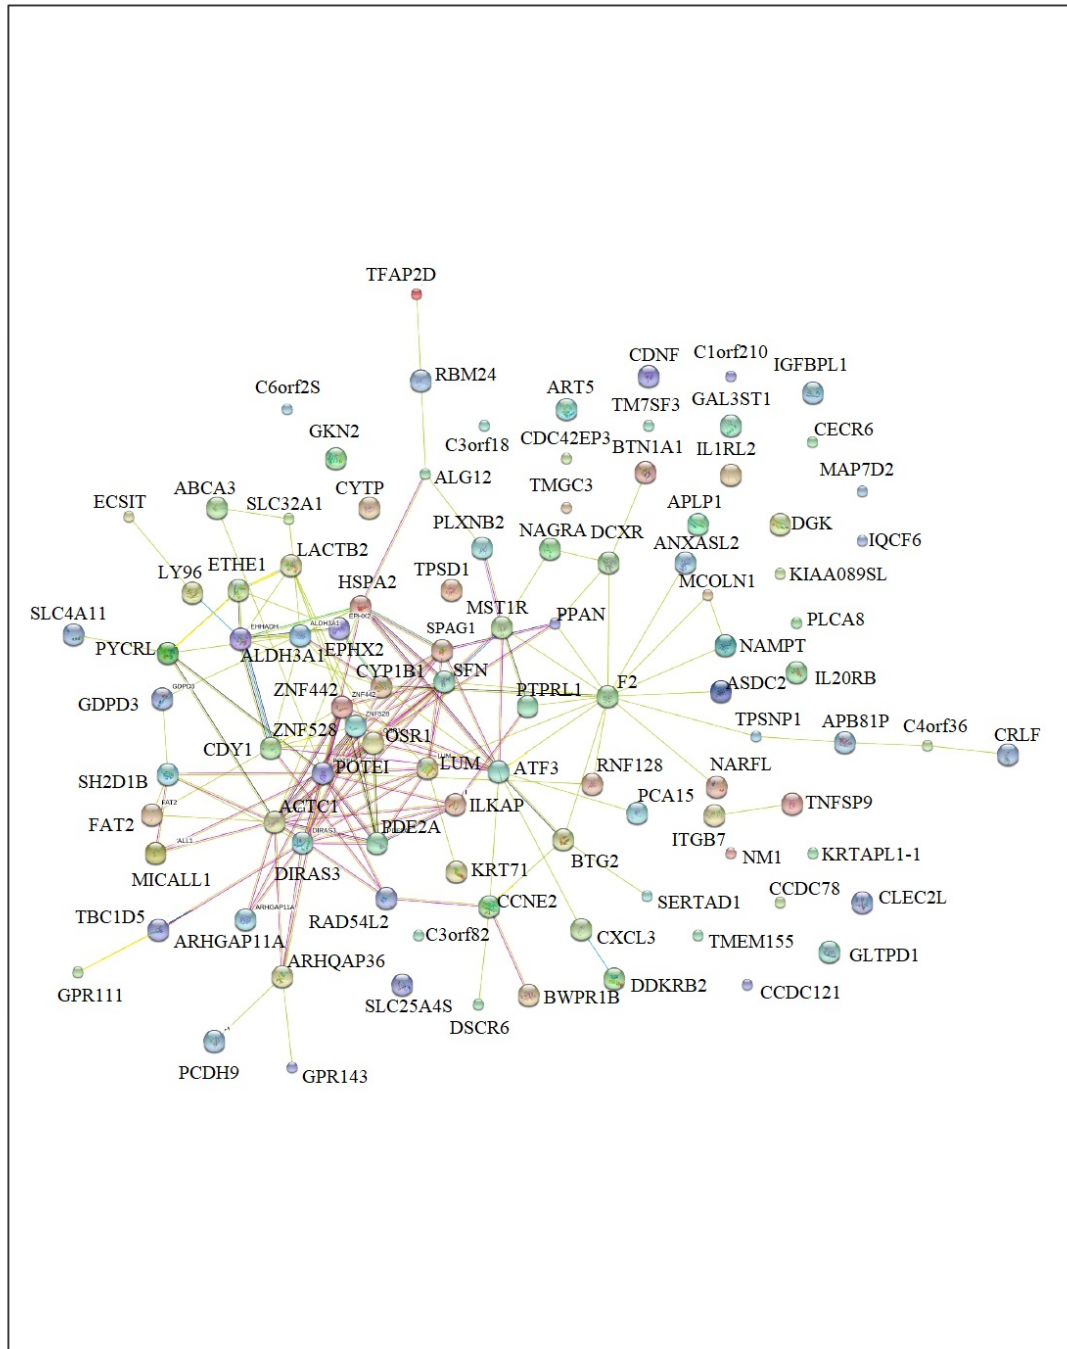

<http://version10.string-db.org/10/p/2831463107>

(d)
